# Supplementary material for: Impact of Helicobacter pylori eradication on the gastric microbiome
Source: Springer Nature journal article supplement (doi:10.1186/s13099-021-00460-2), 2021-10-13

## Supplementary figures

**Figure S1.** Relative abundance of Phyla (A), Classes (B), Orders (C), Families (D), Genera (E) and Species (F) in each group of patients. P, Hp-Positive; FE, Fail eradication; N, Hp-Negative; SE, Successful eradication.

**Figure S2.** Associations of different taxa after *Helicobacter* reads were removed. The heatmaps show partial Spearman correlation coefficients between P and FE groups (A), between N and SE groups (B). P, Hp-positive; FE, Fail eradication; N, Hp-negative; SE, Successful eradication.

**Figure S3.** The normalised relative frequency of nitrate reductase and nitrite reductase in patients with chronic gastritis and gastric carcinoma is shown. (A) N-CG versus SE-CG. (B) N-AG versus SE-AG. (C) N-CG versus N-AG. (D) SE-CG versus SE-AG. Significance was considered for adjusted  $P < 0.05$ . N-CG, Hp-negative chronic gastritis; N-AG, Hp-negative atrophic gastritis; SE-CG, successful-eradication chronic gastritis; SE-AG, successful-eradication atrophic gastritis; NADH, nicotinamide adenine dinucleotide; NO, nitric oxide.

A

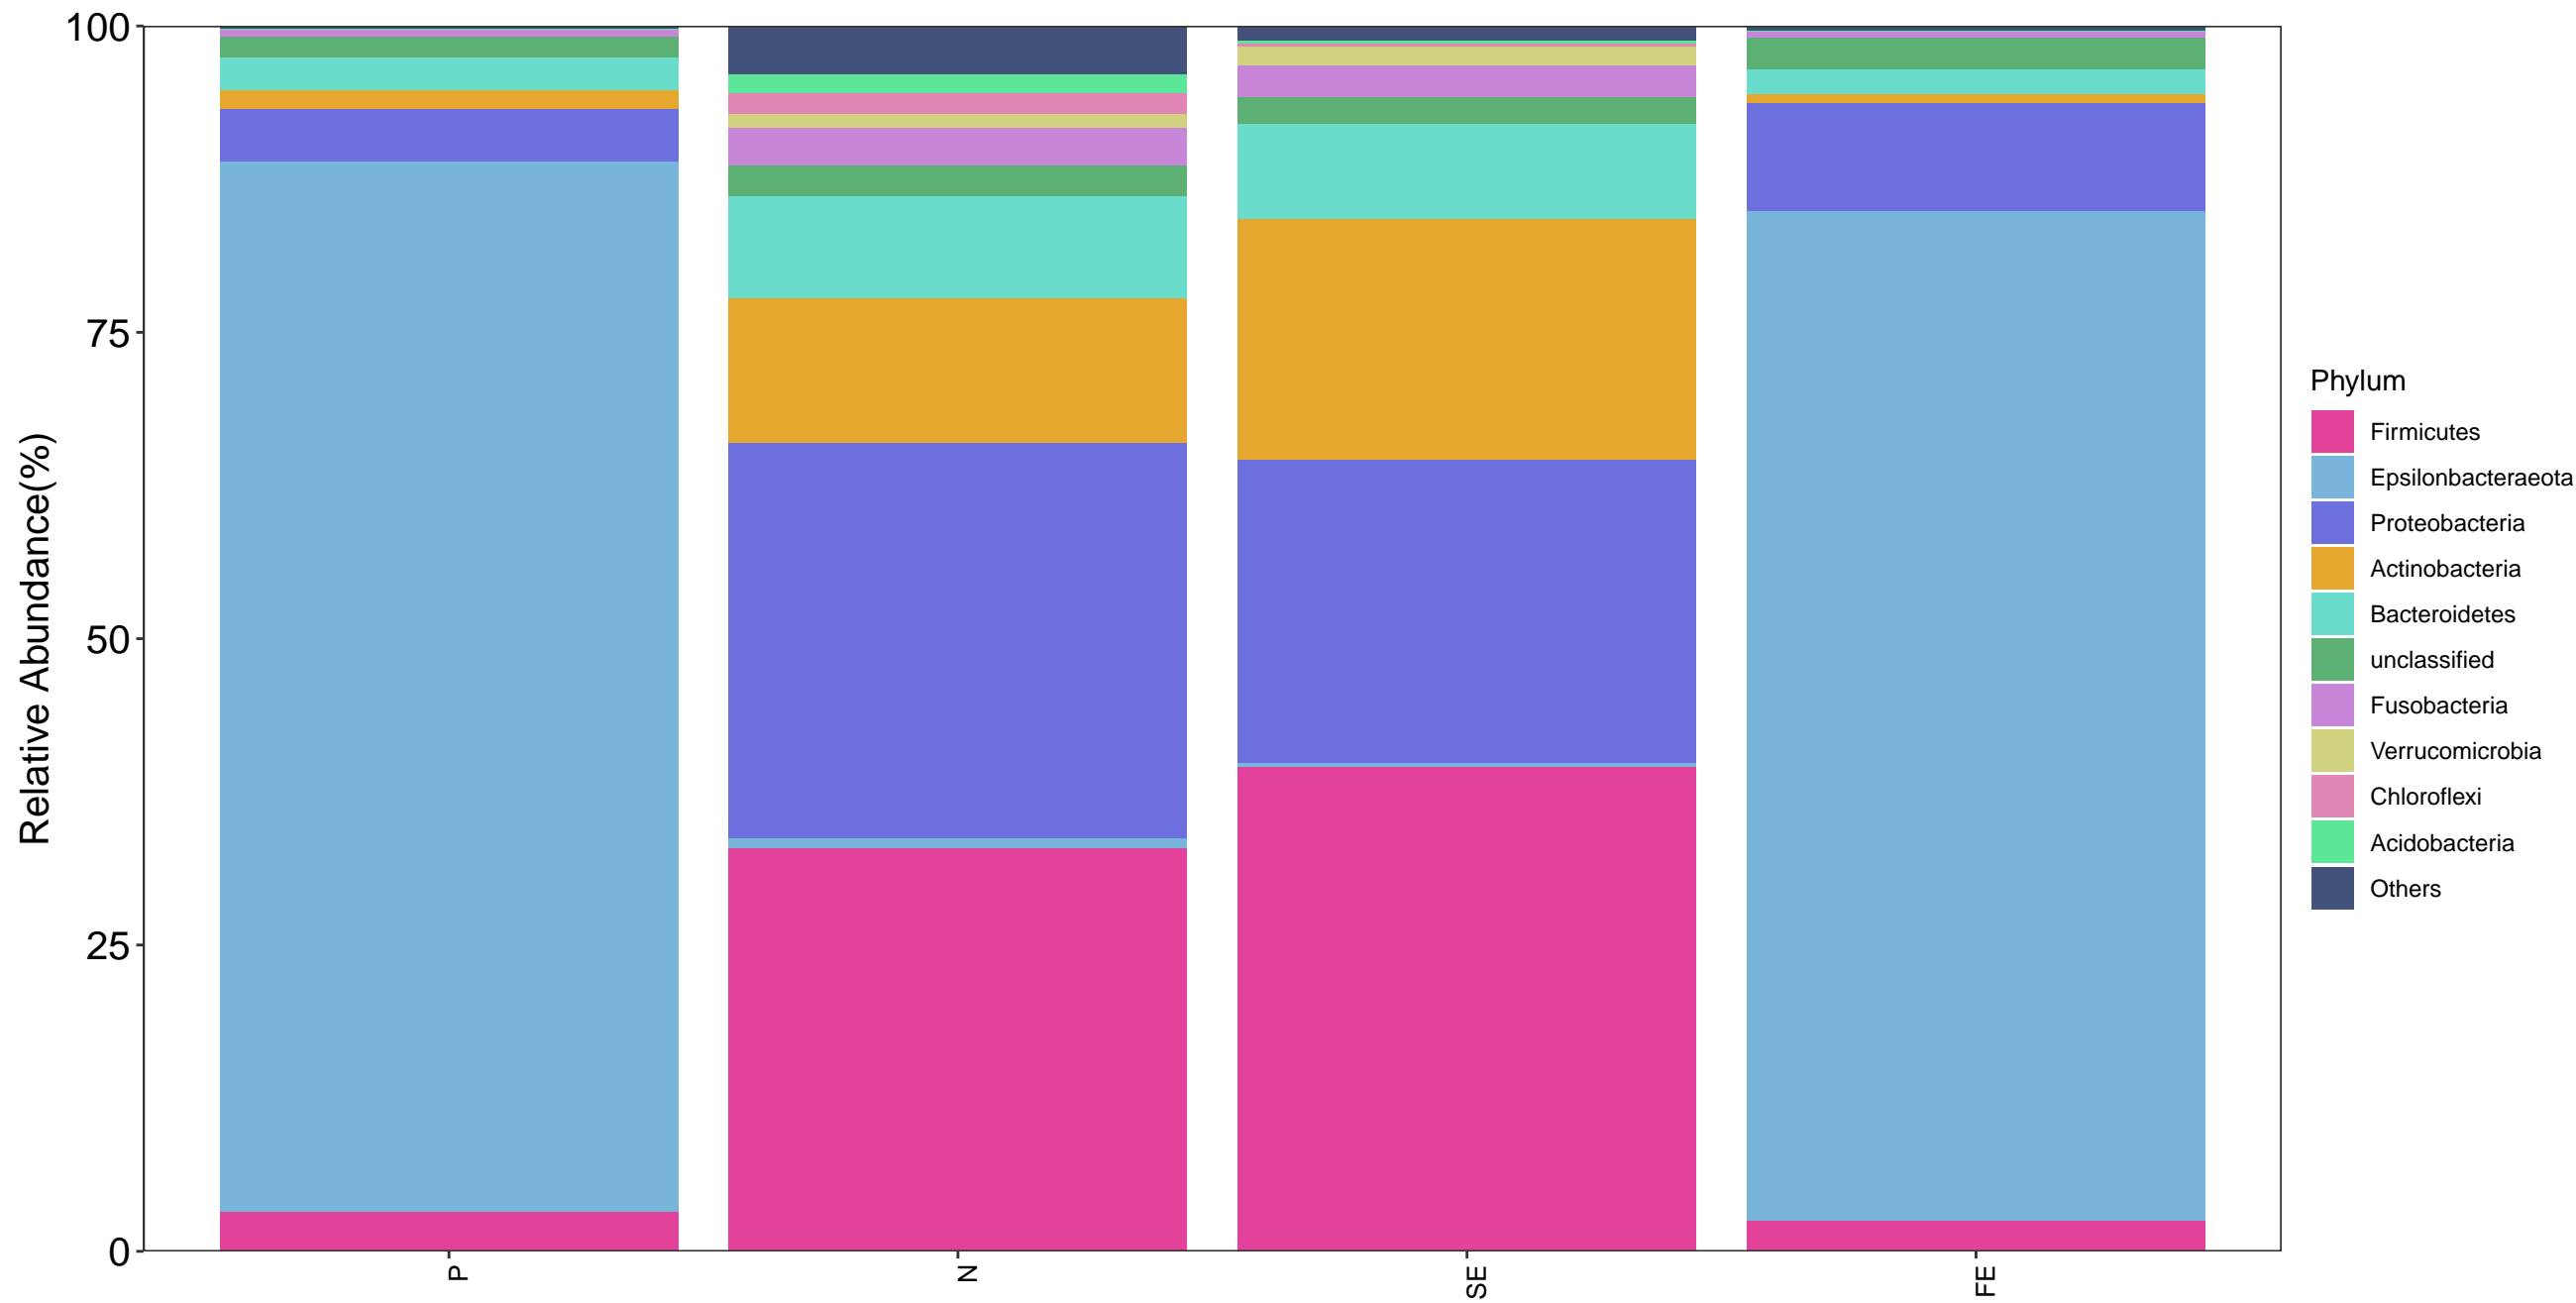



C

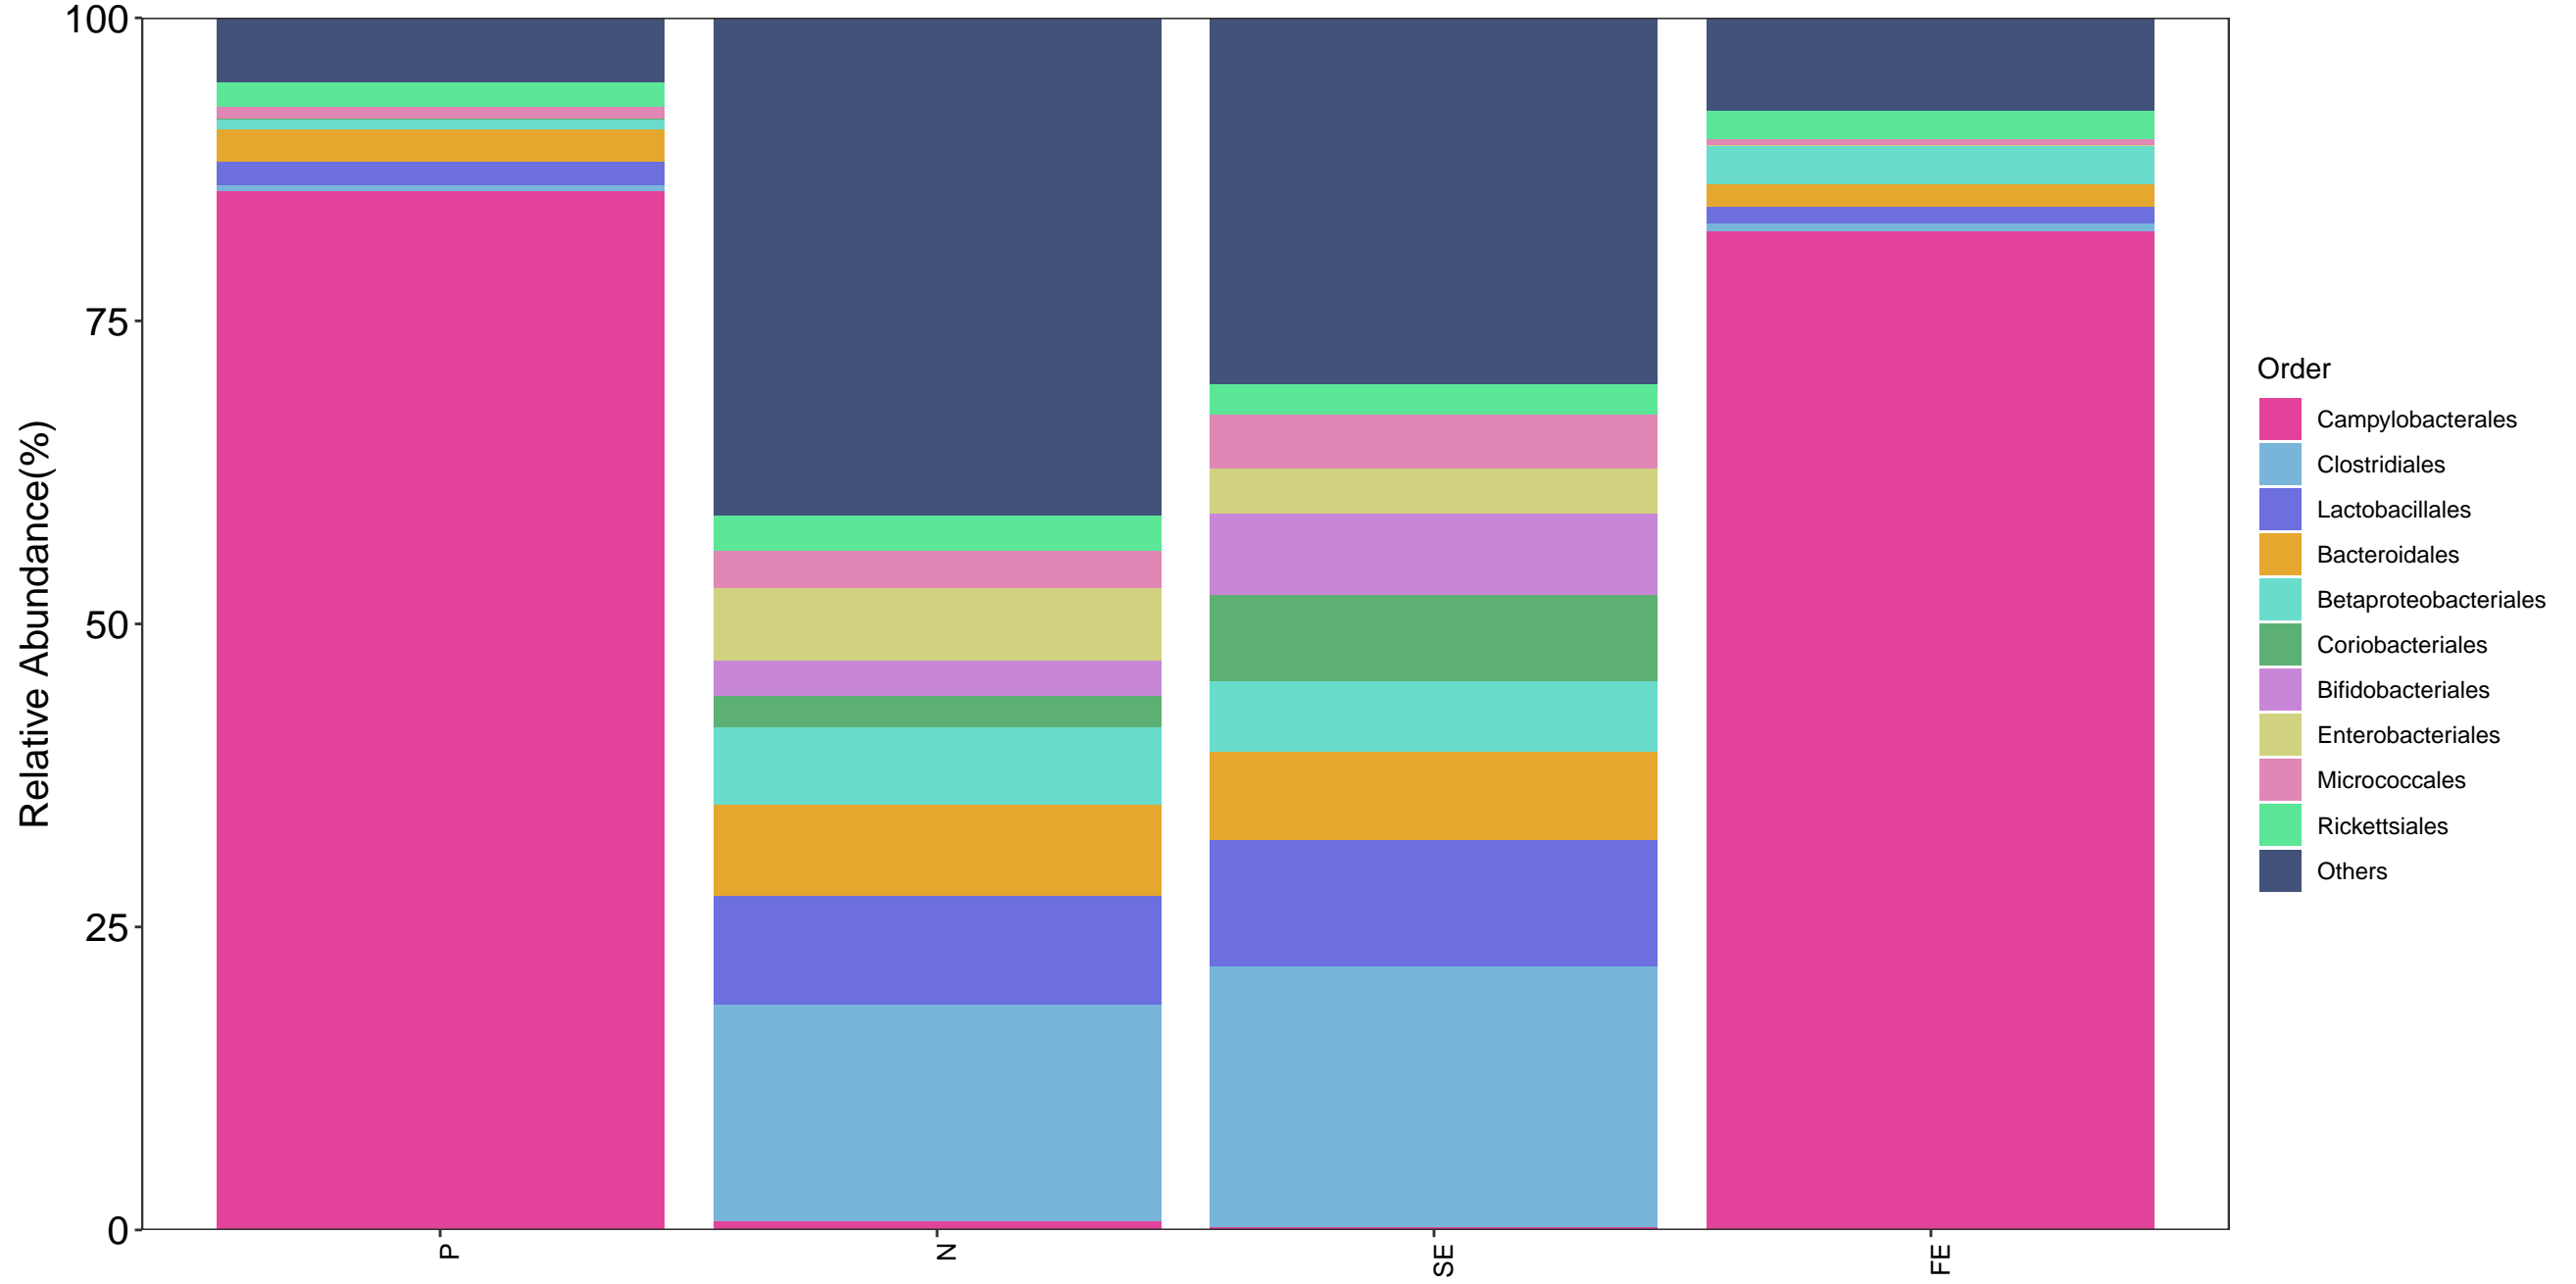







A

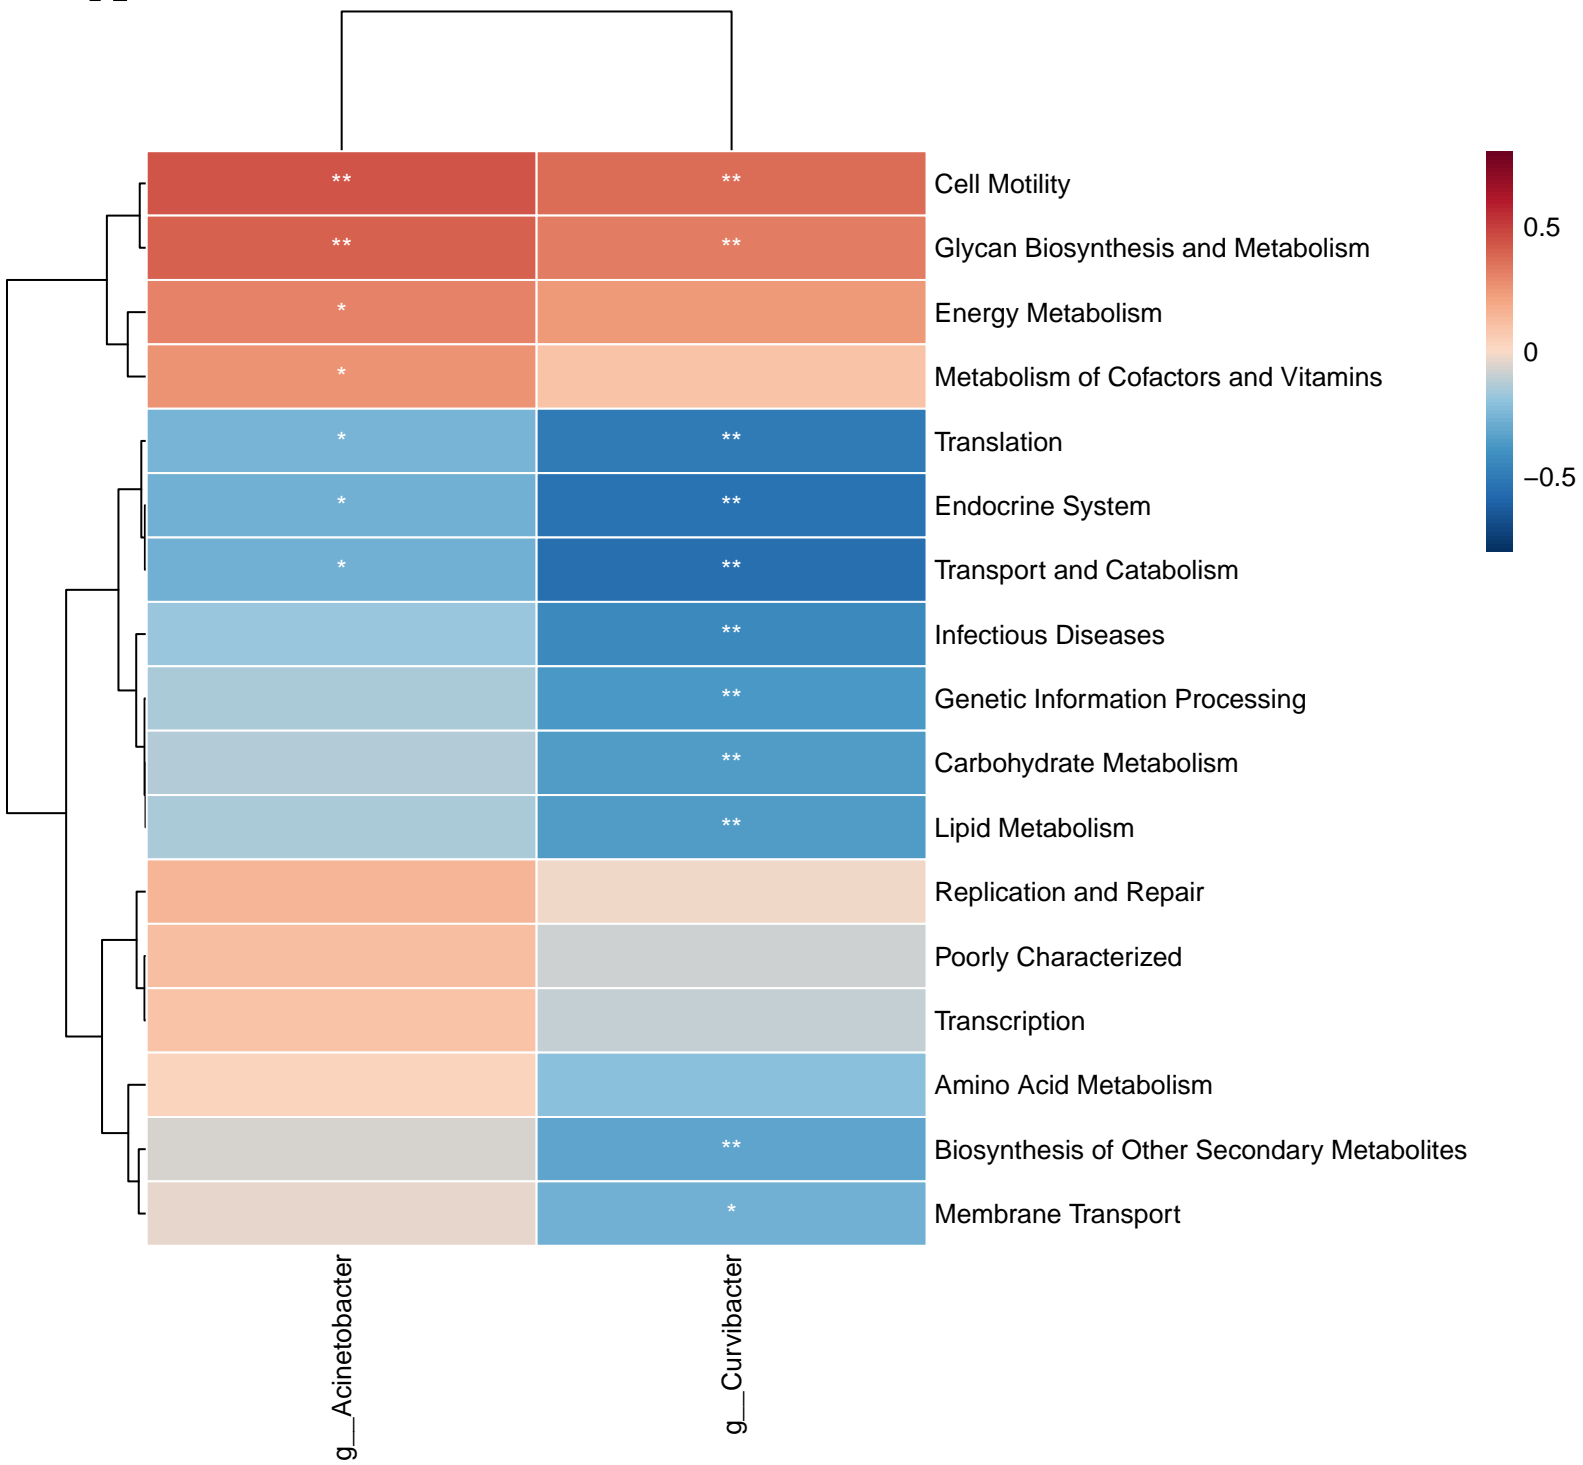



B

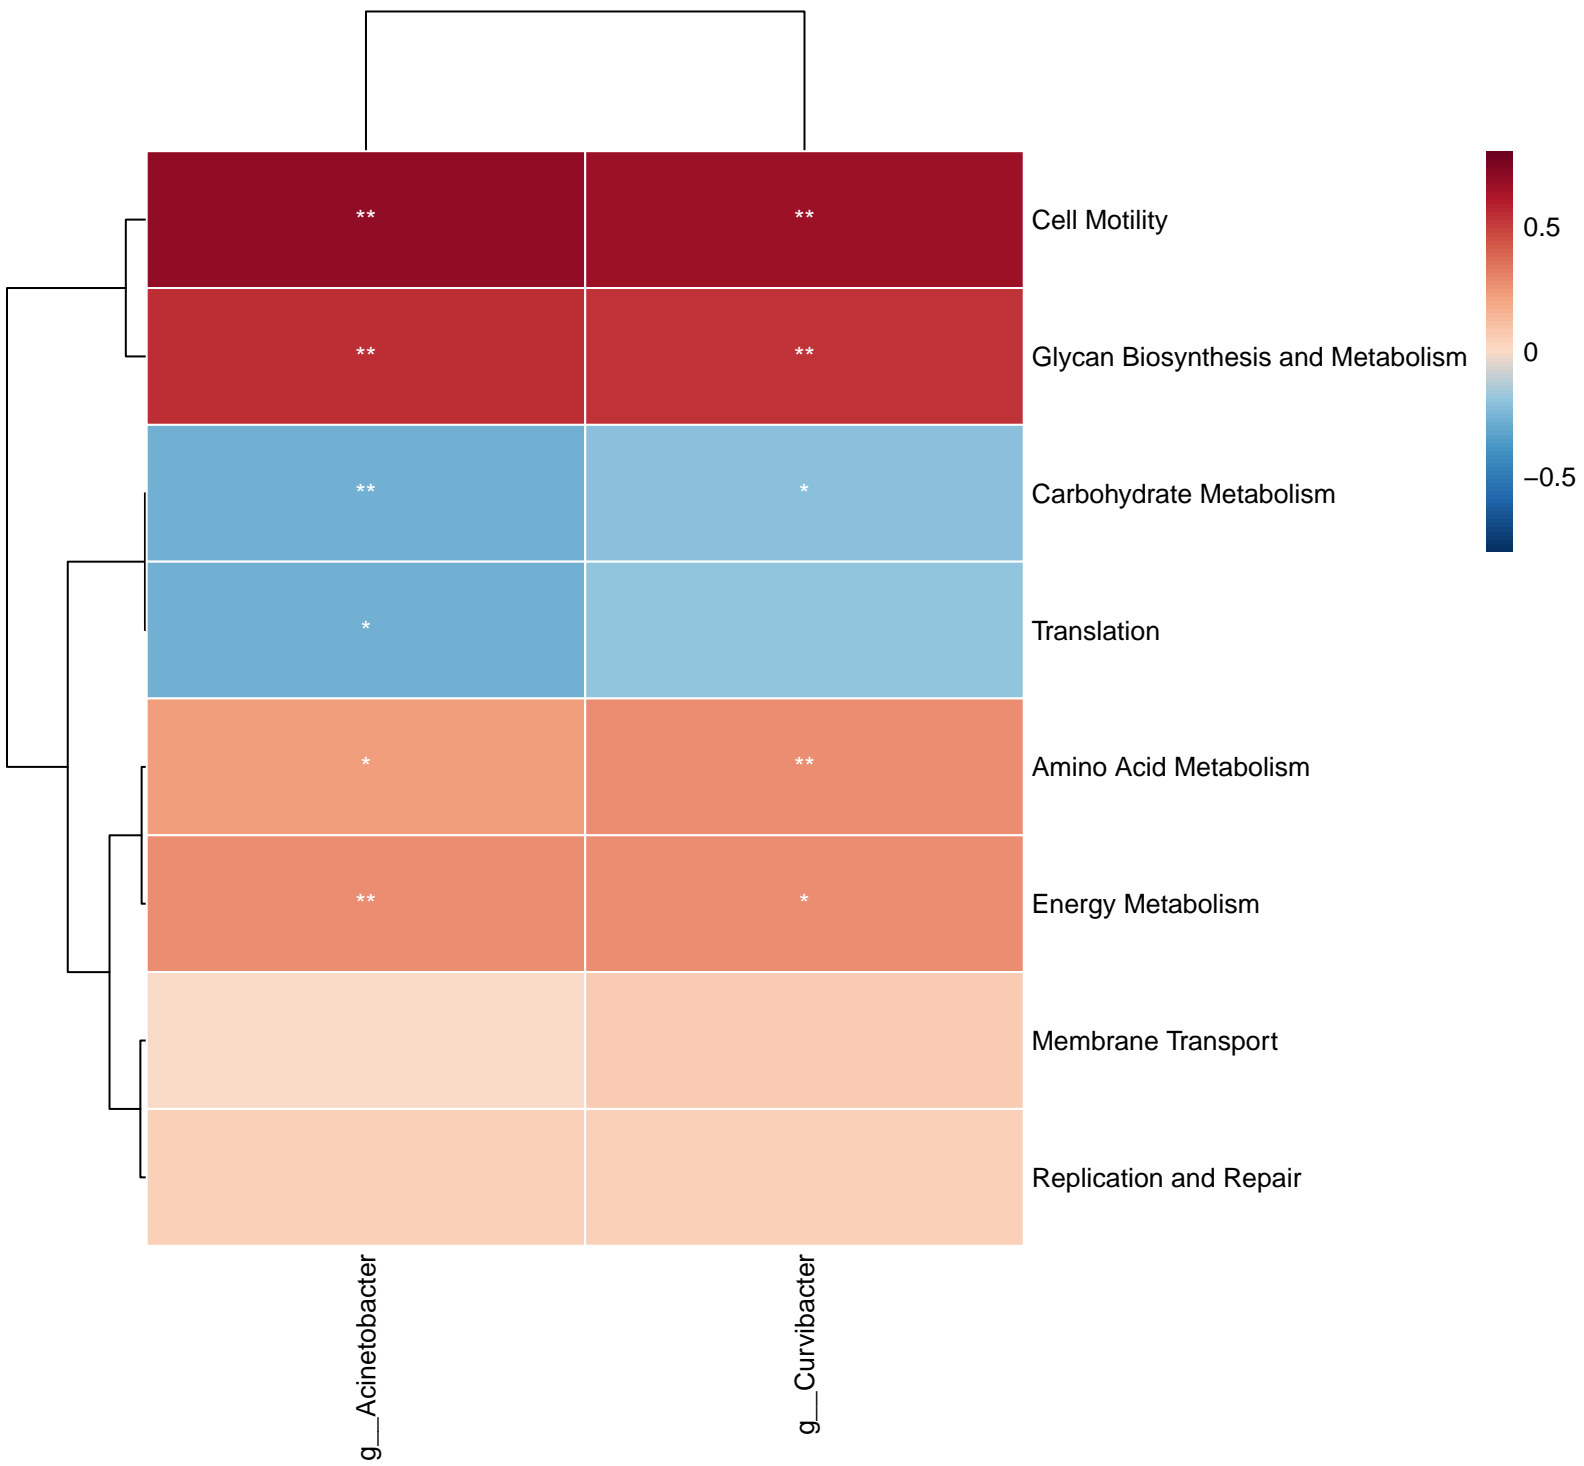

A

N\_CG SE\_CG

95% confidence intervals

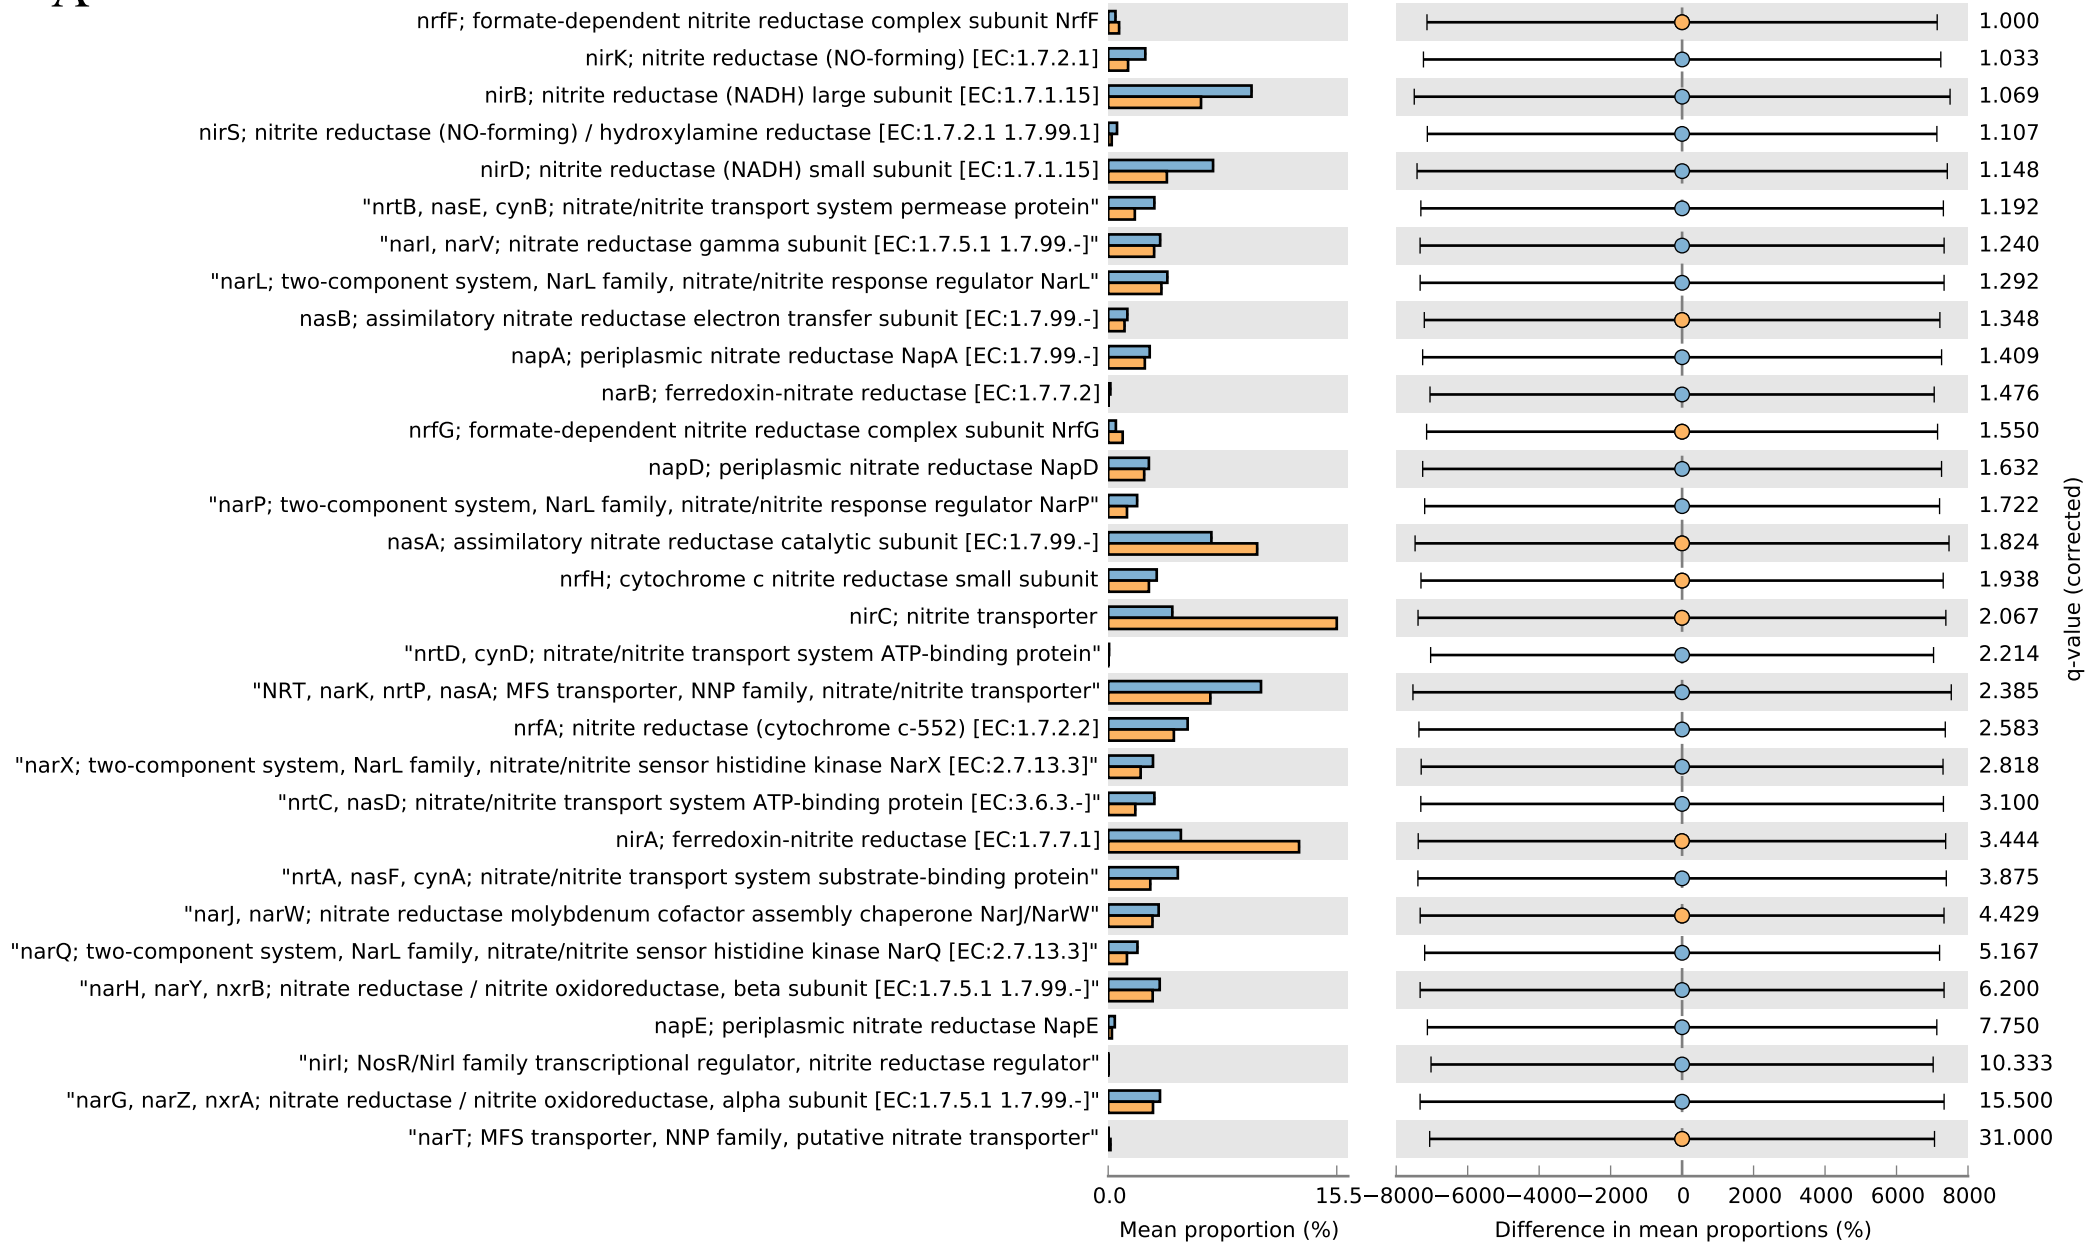

B

N\_AG SE\_AG

95% confidence intervals

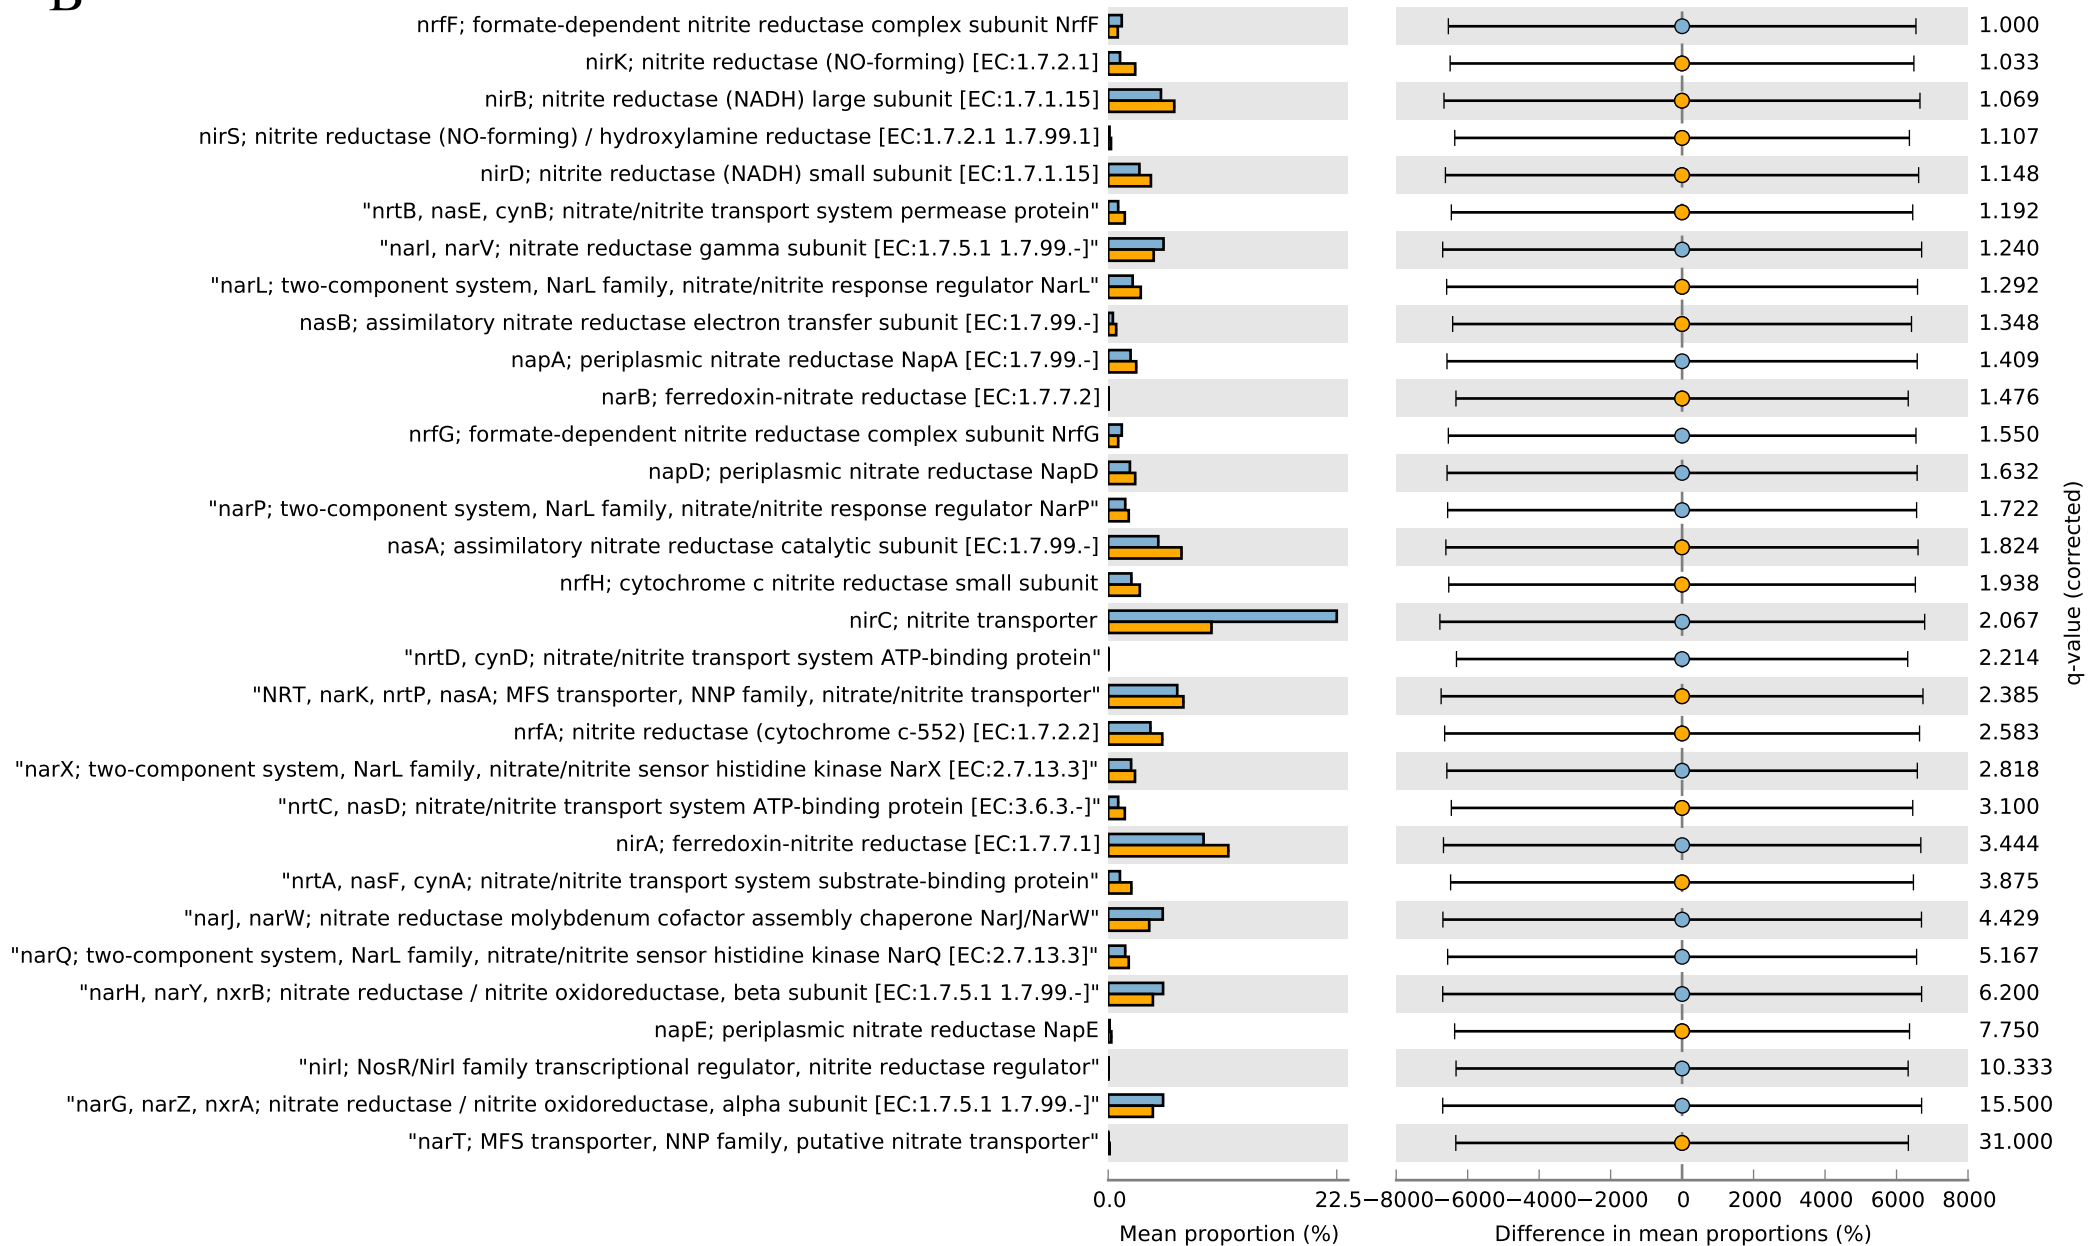

C

N CG N\_AG

95% confidence intervals

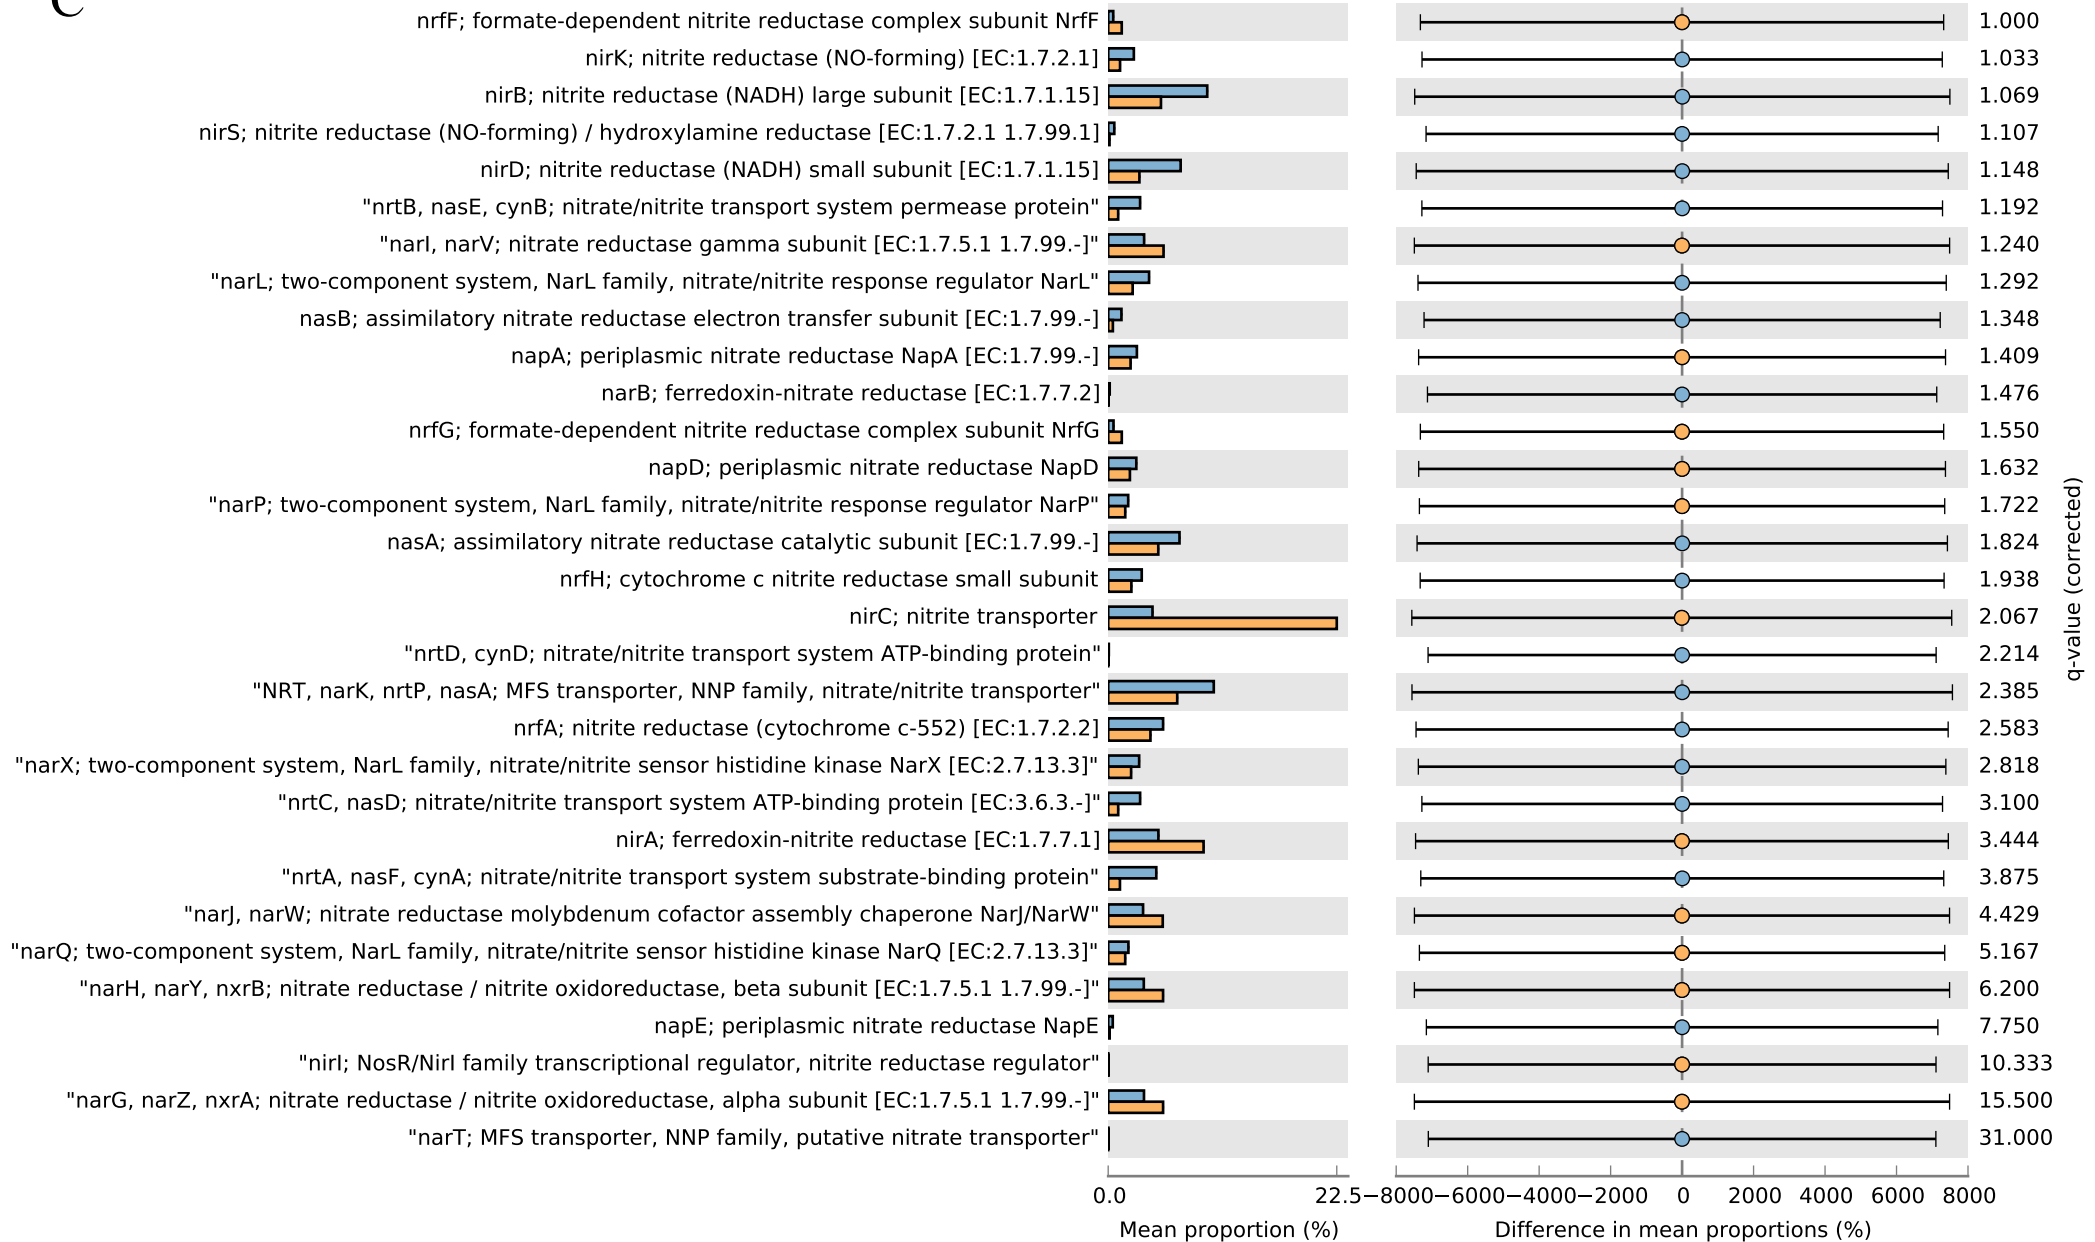

D

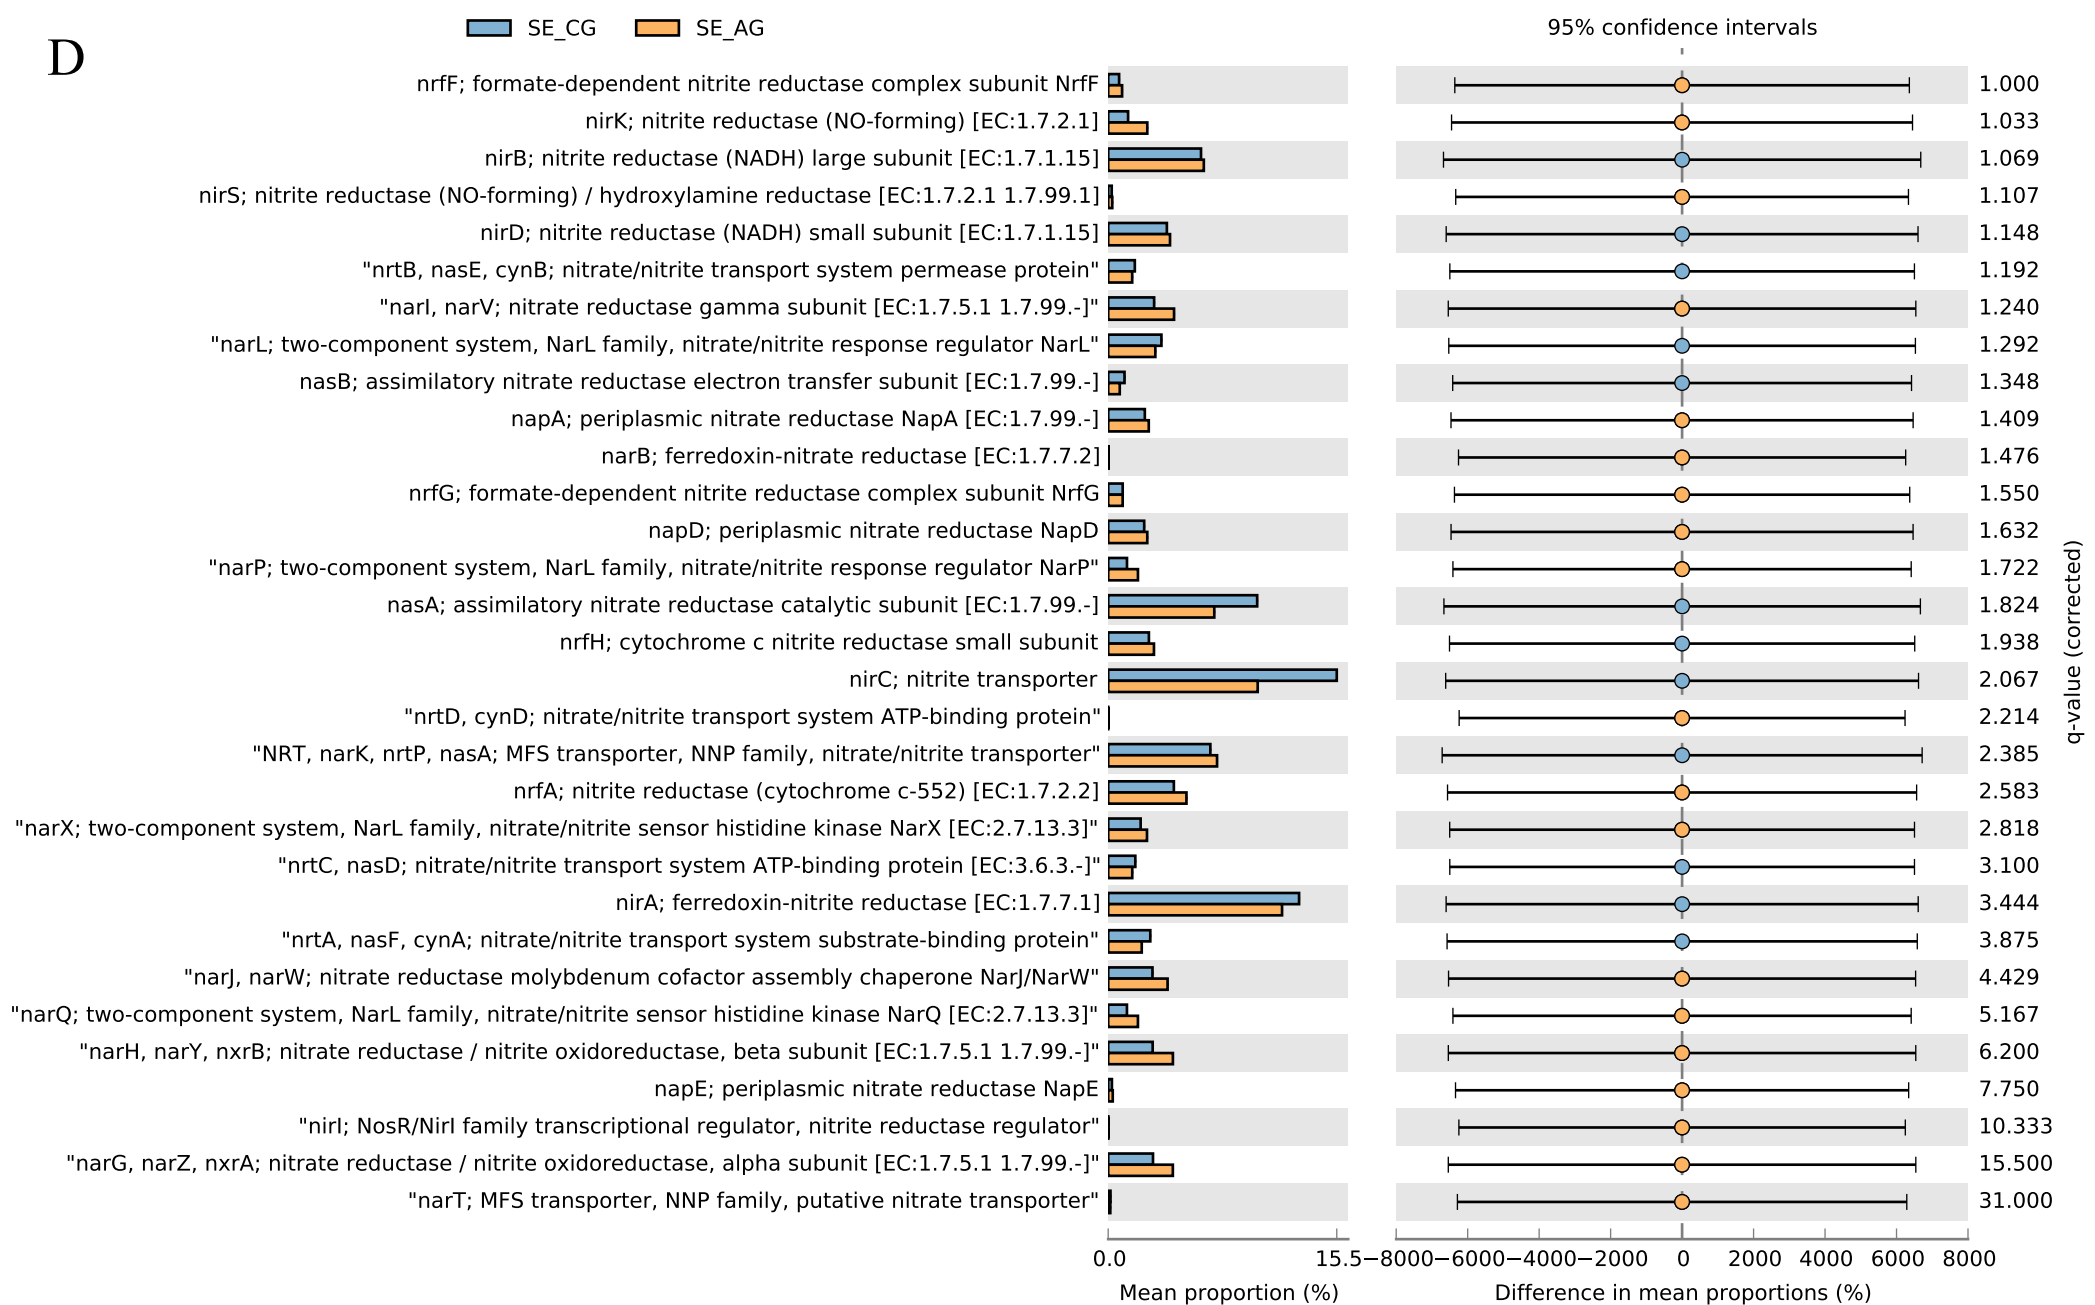

Supplement: MOESM3 [file 19755448]
